# Supplementary material for: A hybridoma-derived monoclonal antibody with high homology to the aberrant myeloma light chain
Source: PubMed Central journal article supplement (PMC8504763; doi:10.1371/journal.pone.0252558), 2021-10-11

Raw image files for Pornnoppadol et al.

Fig 1

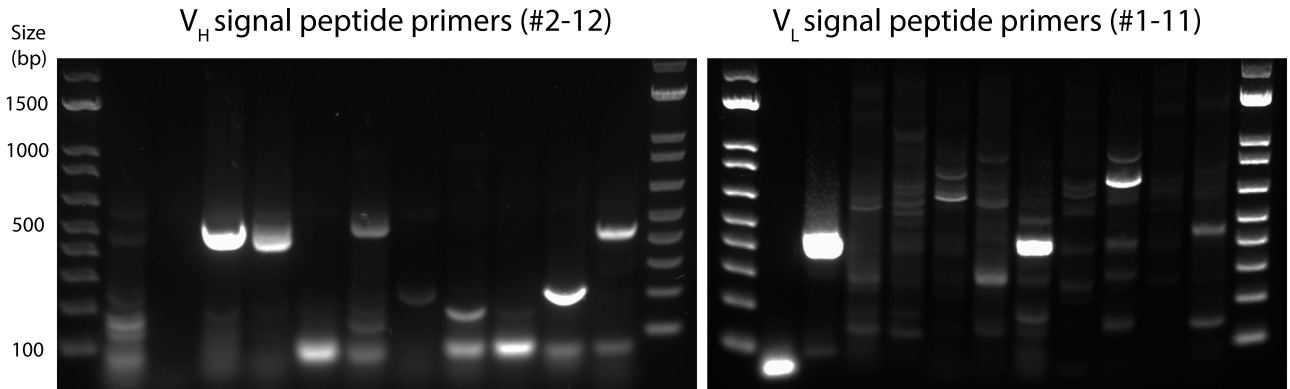

Fig 3B

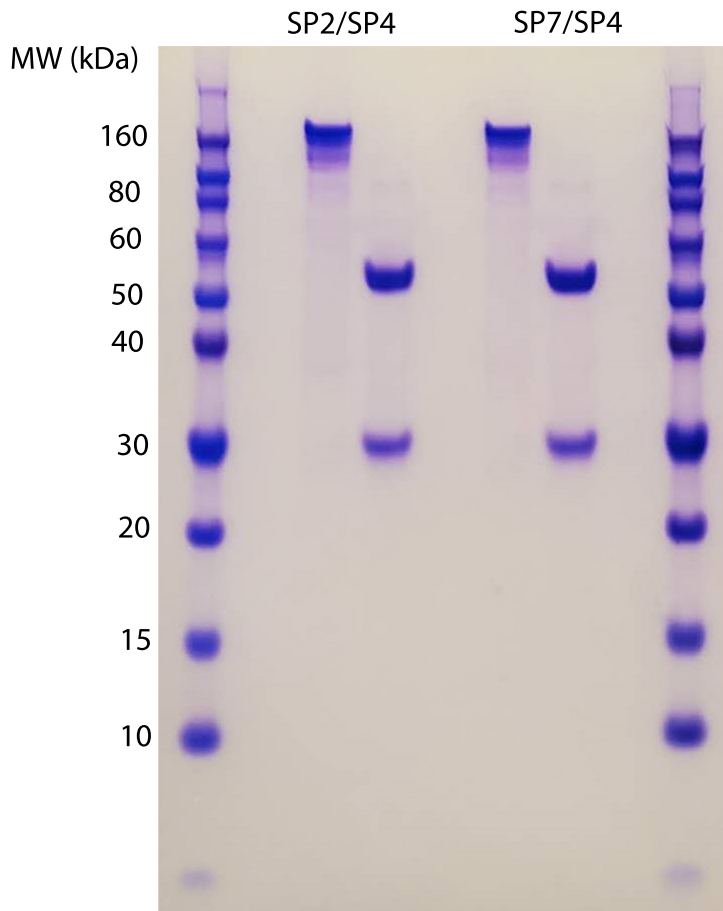

Supplement: pone.0252558.s001.pdf [file pone.0252558.s001.pdf]
