# Supplementary material for: A hybridoma-derived monoclonal antibody with high homology to the aberrant myeloma light chain
Source: PubMed Central journal article supplement (PMC8504763; doi:10.1371/journal.pone.0252558), 2021-10-11
Supplement: pone.0252558.s002.pdf [file pone.0252558.s002.pdf]

Fig S1

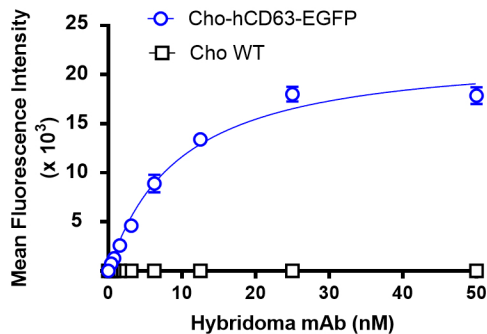

| Concentration (nM) | Mean Fluorescence Intensity |          |          |
|--------------------|-----------------------------|----------|----------|
|                    | CHO-hCD63-EGFP              | CHO WT   | CHO WT   |
| 0                  | 13.59                       | 13.68    | 13.68    |
| 0.390625           | 798.7                       | 692.77   | 692.77   |
| 0.78125            | 1426.23                     | 1153.5   | 1153.5   |
| 1.5625             | 2808.89                     | 2385.78  | 2385.78  |
| 3.125              | 4520.24                     | 4701.53  | 4701.53  |
| 6.25               | 9543.67                     | 8254.47  | 8254.47  |
| 12.5               | 13182.37                    | 13619.39 | 13619.39 |
| 25                 | 17470.04                    | 18535.71 | 17265.7  |
| 50                 | 18473.61                    | 17265.7  | 18535.71 |

**Fig S1.** Binding curve of H5C6 mAb to hCD63-EGFP expressing Cho cells and WT Cho cells

Fig S2

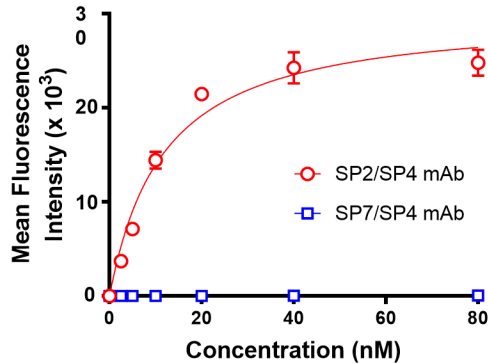

| Concentration (nM) | Mean Fluorescence Intensity |          |             |          |
|--------------------|-----------------------------|----------|-------------|----------|
|                    | SP2/SP4 mAb                 |          | SP7/SP4 mAb |          |
| 80                 | 25757.04                    | 23820.56 | 45.85       | 48.48987 |
| 40                 | 25419.74                    | 23076.36 | 30.1        | 29.83023 |
| 20                 | 21077.27                    | 21865.9  | 22.07       | 21.35034 |
| 10                 | 13789.18                    | 15060.04 | 20.91       | 17.61483 |
| 5                  | 7283.21                     | 6983.821 | 17.22       | 19.27741 |
| 2.5                | 3709.45                     | 3709.07  | 16.86       | 15.88974 |
| 0                  | 17.38                       | 17.64    | 16.1        | 17.04    |

Fig S2. Binding curve of SP2/SP4 mAb and SP7/SP4 mAb to Cho-hCD63-eGFP cells

Fig S3

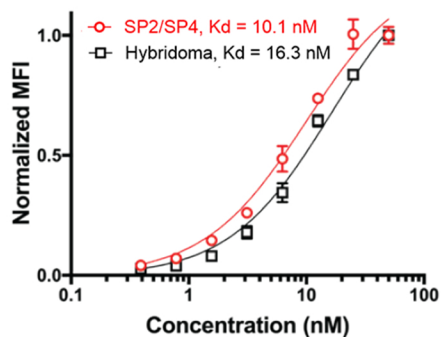

| Concentration (nM) | Mean Fluorescence Intensity |          |                  |          |                      |          |                    |          |
|--------------------|-----------------------------|----------|------------------|----------|----------------------|----------|--------------------|----------|
|                    | Hybridoma CHO-CD63          |          | Hybridoma CHO WT |          | Recombinant CHO-CD63 |          | Recombinant CHO WT |          |
| 50                 | 1.008191                    | 0.991809 | 0.001774         | 0.001958 | 1.024784             | 0.975216 | 0.000664           | 0.000664 |
| 25                 | 0.836719                    | 0.836515 | 0.001826         | 0.001994 | 0.961806             | 1.047987 | 0.000514           | 0.000514 |
| 12.5               | 0.627185                    | 0.660714 | 0.001758         | 0.001922 | 0.742779             | 0.73203  | 0.00046            | 0.00046  |
| 6.25               | 0.317152                    | 0.372107 | 0.001758         | 0.001954 | 0.523746             | 0.447892 | 0.000437           | 0.000437 |
| 3.125              | 0.160862                    | 0.197539 | 0.001663         | 0.001899 | 0.25537              | 0.265778 | 0.000447           | 0.000447 |
| 1.5625             | 0.076719                    | 0.084526 | 0.001643         | 0.00181  | 0.156184             | 0.13479  | 0.000436           | 0.000436 |
| 0.78125            | 0.03914                     | 0.040645 | 0.001728         | 0.001915 | 0.077103             | 0.064074 | 0.000398           | 0.000398 |
| 0.390625           | 0.030952                    | 0.024285 | 0.001692         | 0.001902 | 0.04424              | 0.03766  | 0.000427           | 0.000427 |
| 0                  | 0.004837                    | 0.004853 | 0.001466         | 0.001649 | 0.000753             | 0.000756 | 0.000257           | 0.000257 |

Fig S3. Affinities of SP2/SP4 mAb and H5C6 hybridoma-derived mAb
